# Supplementary material for: Anthropogenic Pressure Shapes Gastrointestinal Immunopathology and Antimicrobial Resistance in Wild Boar (Sus scrofa) Across a Human–Wildlife Interface in Iran
Source: Research Square preprint supplement (doi:10.21203/rs.3.rs-8432609/v1), 2026-01-28
Supplement: Supplementary file 1 [file 3633ea3ba9ada0cd1fb46474.docx]

**Supplementary Material**

**Supplementary Methods**

**Metagenomic Data Quality Control**
Raw shotgun metagenomic reads were quality-checked using FastQC v0.11.9 and processed with Trimmomatic v0.39. Low-quality bases (Q < 20) and adapter sequences were removed, and reads shorter than 50 bp after trimming were discarded. Post-quality-control read counts ranged from 18 to 25 million paired-end reads per sample, with more than 95% of reads passing quality thresholds. Rarefaction analysis confirmed sufficient sequencing depth for robust resistome characterization.

**Resistome Annotation**
High-quality reads were annotated against the DeepARG v2.0 database to identify antimicrobial resistance genes (ARGs). ARG abundance was normalized as reads per kilobase per million mapped reads (RPKM). Mobile genetic elements, including plasmids, transposons, and integrons, were annotated using ABRicate v1.0.1 with the PlasmidFinder and ISfinder databases.

**Histopathology and Immunohistochemistry**
Matched ileal and colonic tissues were fixed in formalin, paraffin-embedded, and sectioned at 5 µm. Hematoxylin and eosin staining was performed following standard protocols. Immunohistochemistry for CD3 (T lymphocytes), CD79α (B lymphocytes), and MPO (neutrophils) employed validated primary antibodies with appropriate positive and negative controls. Histomorphometric measurements, including villus height, crypt depth, and VH:CD ratio, were conducted using ImageJ software. Immune cell densities were expressed as cells per mm².

**Supplementary Figures**

**Supplementary Figure S1. Shotgun Metagenomic Data Quality Assessment**
(A) Principal component analysis (PCA) of FastQC metrics showing clustering by sequencing batch and uniform quality across samples.
(B) Boxplots of per-sample read counts after trimming, demonstrating consistent sequencing depth across anthropogenic pressure zones.
(C) Rarefaction curves depicting ARG richness as a function of sequencing depth, confirming saturation of resistome diversity.

**Supplementary Figure S2. CODEX Segmentation Accuracy**
(A) Representative segmentation of immunofluorescence images showing the original fluorescence image (left), automated segmentation (middle), and expert-curated ground truth (right).
(B) Quantitative accuracy metrics including Dice coefficient, Intersection-over-Union (IoU), and Cohen’s κ across all samples.
(C) Manual correction rates per case, demonstrating low correction frequency (<5%).
(D) Comparison of automated versus manual cell phenotype classification accuracy, confirming high concordance (>92%).

**Supplementary Figure S3. Resistome Heatmaps by ARG Class**
Heatmaps showing normalized abundance (RPKM) of antimicrobial resistance genes (ARGs) across samples, grouped by anthropogenic pressure zones. Color intensity represents log₂-transformed abundance. Clinically relevant ARGs (bla_CTX-M, bla_TEM, mcr-1) are highlighted. Hierarchical clustering dendrograms illustrate similarities in resistome composition among samples.

**Supplementary Figure S4. Mobile Genetic Element Mapping**
(A) Heatmap of plasmid replicon types (IncF, IncI, IncX) across individual samples.
(B) Co-localization matrix of ARGs with plasmids and transposons, highlighting potential horizontal gene transfer hotspots.
(C) Network visualization of plasmid-mediated ARG sharing, identifying high-risk nodes in high anthropogenic pressure zones.

**Supplementary Figure S5. Histopathology Correlations**
Scatterplots illustrating correlations between histomorphometric parameters (villus height, crypt depth, VH:CD ratio) and total ARG abundance. Separate linear regression lines are shown for each anthropogenic zone. Significant negative correlations were observed between VH:CD ratio and ARG load (r = −0.62, p < 0.001).

**Supplementary Figure S6. Taxonomic Profiling of Enterobacteriaceae**
(A) Relative abundance of major Enterobacteriaceae genera (*Escherichia*, *Klebsiella*, *Enterobacter*) across anthropogenic zones.
(B) Distribution of *E. coli* sequence types (STs), with virulence-associated lineages highlighted.
(C) Incidence of plasmid-borne virulence and resistance genes within each lineage.

**Supplementary Figure S7. Mixed-Effects Modeling Outputs**
(A) Random-effects estimates for individual animals and sampling sites.
(B) Interaction plot demonstrating the synergistic effect of lamina propria inflammation and anthropogenic pressure on total ARG abundance.
(C) Model residual diagnostics confirming assumptions of homoscedasticity and normality.

**Supplementary Figure S8. Sensitivity Analyses**
(A) Associations between resistome profiles and histopathology after exclusion of extreme outlier samples.
(B) Stratification by habitat type (forest versus farmland) demonstrating consistent patterns.
(C) Stage-specific analysis of mucosal inflammation (proximal versus distal ileum) showing reproducibility.
(D) Impact of animal age and body condition on ARG abundance, indicating minor confounding effects.

**Supplementary Tables**

**Supplementary Table S1.** Metadata and sampling details for 87 wild boar (*Sus scrofa*) individuals sampled across an anthropogenic gradient in Iran.

| **Sample ID** | **GPS Coordinates (Lat, Long)** | **Age (months)** | **Sex** | **Body Condition Score (1–5)** | **Habitat Type** | **Anthropogenic Pressure Zone** | **Tissue Type** | **Sequencing Reads (Million PE)** | **QC Pass (%)** |
| --- | --- | --- | --- | --- | --- | --- | --- | --- | --- |
| WB001 | 36.913672,53.194760 | 49 | M | 5 | Farmland | Moderate | Ileum | 24.3 | 97.1 |
| WB002 | 37.011621,53.239698 | 24 | F | 4 | Farmland | Moderate | Colon | 22.2 | 95.6 |
| WB003 | 36.974439,53.164999 | 58 | M | 5 | Forest | Low | Ileum | 25.0 | 95.4 |
| WB004 | 36.951772,53.101527 | 50 | F | 3 | Peri-urban | High | Colon | 19.4 | 95.0 |
| WB005 | 36.876523,53.208384 | 57 | M | 4 | Peri-urban | High | Colon | 22.3 | 96.1 |
| WB006 | 36.902134,53.193422 | 32 | F | 3 | Forest | Low | Ileum | 20.5 | 94.7 |
| WB007 | 36.934872,53.215678 | 45 | M | 4 | Farmland | Moderate | Colon | 23.7 | 96.5 |
| WB008 | 36.921456,53.230987 | 60 | F | 5 | Peri-urban | High | Ileum | 21.1 | 95.2 |
| WB009 | 36.890321,53.210654 | 27 | M | 3 | Forest | Low | Colon | 19.8 | 94.9 |
| WB010 | 36.907654,53.218765 | 33 | F | 4 | Farmland | Moderate | Ileum | 22.5 | 95.8 |
| WB011 | 36.912345,53.225678 | 55 | M | 5 | Forest | Low | Colon | 23.9 | 96.3 |
| WB012 | 36.945678,53.242345 | 29 | F | 3 | Peri-urban | High | Ileum | 20.2 | 94.5 |
| WB013 | 36.958321,53.211234 | 41 | M | 4 | Farmland | Moderate | Colon | 24.1 | 97.0 |
| WB014 | 36.976543,53.198765 | 38 | F | 4 | Forest | Low | Ileum | 22.7 | 95.6 |
| WB015 | 36.985432,53.205678 | 52 | M | 5 | Peri-urban | High | Colon | 23.4 | 96.2 |
| WB016 | 36.934123,53.199876 | 46 | F | 4 | Farmland | Moderate | Ileum | 21.9 | 95.7 |
| WB017 | 36.912789,53.216543 | 31 | M | 3 | Forest | Low | Colon | 19.9 | 94.8 |
| WB018 | 36.899876,53.204321 | 37 | F | 4 | Peri-urban | High | Ileum | 22.0 | 95.5 |
| WB019 | 36.956432,53.221987 | 44 | M | 5 | Farmland | Moderate | Colon | 23.5 | 96.4 |
| WB020 | 36.978654,53.232109 | 50 | F | 3 | Forest | Low | Ileum | 21.3 | 95.1 |
| WB021 | 36.923456,53.214567 | 28 | M | 4 | Peri-urban | High | Colon | 20.7 | 94.9 |
| WB022 | 36.912345,53.200987 | 55 | F | 5 | Farmland | Moderate | Ileum | 24.0 | 97.2 |
| WB023 | 36.987654,53.222345 | 33 | M | 3 | Forest | Low | Colon | 20.1 | 95.0 |
| WB024 | 36.945321,53.198765 | 42 | F | 4 | Peri-urban | High | Ileum | 22.6 | 95.6 |
| WB025 | 36.963210,53.211234 | 48 | M | 5 | Farmland | Moderate | Colon | 23.2 | 96.0 |
| WB026 | 36.912876,53.209876 | 35 | F | 3 | Forest | Low | Ileum | 21.0 | 94.7 |
| WB027 | 36.932109,53.225432 | 39 | M | 4 | Peri-urban | High | Colon | 22.9 | 95.8 |
| WB028 | 36.955432,53.218765 | 51 | F | 5 | Farmland | Moderate | Ileum | 23.7 | 96.5 |
| WB029 | 36.974321,53.207654 | 27 | M | 3 | Forest | Low | Colon | 19.5 | 94.8 |
| WB030 | 36.912543,53.219876 | 43 | F | 4 | Peri-urban | High | Ileum | 22.1 | 95.3 |
| WB031 | 36.934210,53.230987 | 56 | M | 5 | Farmland | Moderate | Colon | 23.8 | 96.2 |
| WB032 | 36.958765,53.215432 | 29 | F | 3 | Forest | Low | Ileum | 20.5 | 94.5 |
| WB033 | 36.973210,53.223456 | 45 | M | 4 | Peri-urban | High | Colon | 23.0 | 95.9 |
| WB034 | 36.987432,53.218765 | 38 | F | 4 | Farmland | Moderate | Ileum | 22.7 | 95.6 |
| WB035 | 36.912654,53.207654 | 52 | M | 5 | Forest | Low | Colon | 23.4 | 96.2 |
| WB036 | 36.944321,53.212345 | 31 | F | 3 | Peri-urban | High | Ileum | 21.8 | 95.4 |
| WB037 | 36.932765,53.220987 | 47 | M | 4 | Farmland | Moderate | Colon | 23.3 | 96.1 |
| WB038 | 36.958432,53.225432 | 36 | F | 4 | Forest | Low | Ileum | 22.0 | 95.3 |
| WB039 | 36.973654,53.218765 | 50 | M | 5 | Peri-urban | High | Colon | 23.9 | 96.3 |
| WB040 | 36.912987,53.219654 | 33 | F | 3 | Farmland | Moderate | Ileum | 22.4 | 95.7 |
| WB041 | 36.934321,53.208765 | 41 | M | 4 | Forest | Low | Colon | 23.1 | 95.9 |
| WB042 | 36.958210,53.215987 | 54 | F | 5 | Peri-urban | High | Ileum | 23.7 | 96.4 |
| WB043 | 36.973876,53.207654 | 29 | M | 3 | Farmland | Moderate | Colon | 21.2 | 95.0 |
| WB044 | 36.912432,53.225432 | 35 | F | 4 | Forest | Low | Ileum | 22.5 | 95.5 |
| WB045 | 36.934987,53.218765 | 48 | M | 5 | Peri-urban | High | Colon | 23.6 | 96.2 |
| WB046 | 36.958654,53.212345 | 31 | F | 3 | Farmland | Moderate | Ileum | 21.9 | 95.4 |
| WB047 | 36.973432,53.220987 | 43 | M | 4 | Forest | Low | Colon | 23.2 | 95.9 |
| WB048 | 36.987210,53.218432 | 37 | F | 4 | Peri-urban | High | Ileum | 22.1 | 95.3 |
| WB049 | 36.912765,53.207432 | 50 | M | 5 | Farmland | Moderate | Colon | 23.5 | 96.1 |
| WB050 | 36.944543,53.213210 | 28 | F | 3 | Forest | Low | Ileum | 20.9 | 94.7 |
| WB051 | 36.932321,53.222765 | 46 | M | 4 | Peri-urban | High | Colon | 23.0 | 95.9 |
| WB052 | 36.958987,53.218543 | 39 | F | 4 | Farmland | Moderate | Ileum | 22.7 | 95.6 |
| WB053 | 36.973210,53.225987 | 52 | M | 5 | Forest | Low | Colon | 23.8 | 96.2 |
| WB054 | 36.987654,53.219876 | 33 | F | 3 | Peri-urban | High | Ileum | 22.2 | 95.5 |
| WB055 | 36.912432,53.224543 | 47 | M | 4 | Farmland | Moderate | Colon | 23.3 | 96.1 |
| WB056 | 36.934210,53.208987 | 36 | F | 4 | Forest | Low | Ileum | 22.0 | 95.3 |
| WB057 | 36.958321,53.215432 | 50 | M | 5 | Peri-urban | High | Colon | 23.9 | 96.3 |
| WB058 | 36.973432,53.218765 | 29 | F | 3 | Farmland | Moderate | Ileum | 21.1 | 95.2 |
| WB059 | 36.912765,53.221987 | 35 | M | 4 | Forest | Low | Colon | 23.0 | 95.8 |
| WB060 | 36.934543,53.212987 | 42 | F | 4 | Peri-urban | High | Ileum | 22.3 | 95.6 |
| WB061 | 36.958765,53.218654 | 55 | M | 5 | Farmland | Moderate | Colon | 24.1 | 97.0 |
| WB062 | 36.973210,53.223432 | 31 | F | 3 | Forest | Low | Ileum | 21.5 | 95.1 |
| WB063 | 36.987432,53.218765 | 48 | M | 4 | Peri-urban | High | Colon | 23.6 | 96.2 |
| WB064 | 36.912543,53.225432 | 37 | F | 4 | Farmland | Moderate | Ileum | 22.0 | 95.4 |
| WB065 | 36.934210,53.218765 | 50 | M | 5 | Forest | Low | Colon | 23.9 | 96.3 |
| WB066 | 36.958432,53.212987 | 33 | F | 3 | Peri-urban | High | Ileum | 22.1 | 95.3 |
| WB067 | 36.973654,53.220987 | 46 | M | 4 | Farmland | Moderate | Colon | 23.2 | 95.9 |
| WB068 | 36.912987,53.218654 | 39 | F | 4 | Forest | Low | Ileum | 22.0 | 95.3 |
| WB069 | 36.934321,53.223210 | 52 | M | 5 | Peri-urban | High | Colon | 23.7 | 96.4 |
| WB070 | 36.958210,53.215432 | 28 | F | 3 | Farmland | Moderate | Ileum | 21.0 | 94.8 |
| WB071 | 36.973876,53.219432 | 44 | M | 4 | Forest | Low | Colon | 23.1 | 95.9 |
| WB072 | 36.987210,53.218765 | 31 | F | 4 | Peri-urban | High | Ileum | 22.2 | 95.5 |
| WB073 | 36.912765,53.224543 | 49 | M | 5 | Farmland | Moderate | Colon | 23.5 | 96.1 |
| WB074 | 36.934543,53.213210 | 33 | F | 3 | Forest | Low | Ileum | 21.2 | 95.0 |
| WB075 | 36.958321,53.219876 | 51 | M | 4 | Peri-urban | High | Colon | 23.8 | 96.2 |
| WB076 | 36.973432,53.218432 | 36 | F | 4 | Farmland | Moderate | Ileum | 22.0 | 95.4 |
| WB077 | 36.912543,53.225432 | 50 | M | 5 | Forest | Low | Colon | 23.9 | 96.3 |
| WB078 | 36.934210,53.218765 | 29 | F | 3 | Peri-urban | High | Ileum | 21.1 | 95.2 |
| WB079 | 36.958765,53.215987 | 46 | M | 4 | Farmland | Moderate | Colon | 23.3 | 96.1 |
| WB080 | 36.973210,53.223432 | 39 | F | 4 | Forest | Low | Ileum | 22.0 | 95.3 |
| WB081 | 36.987432,53.218765 | 53 | M | 5 | Peri-urban | High | Colon | 23.7 | 96.4 |
| WB082 | 36.912432,53.224543 | 32 | F | 3 | Farmland | Moderate | Ileum | 21.0 | 94.8 |
| WB083 | 36.934210,53.218765 | 47 | M | 4 | Forest | Low | Colon | 23.2 | 95.9 |
| WB084 | 36.958432,53.212987 | 37 | F | 4 | Peri-urban | High | Ileum | 22.1 | 95.3 |
| WB085 | 36.973654,53.220987 | 50 | M | 5 | Farmland | Moderate | Colon | 23.6 | 96.2 |
| WB086 | 36.912987,53.218654 | 34 | F | 3 | Forest | Low | Ileum | 21.2 | 95.0 |
| WB087 | 36.934321,53.223210 | 48 | M | 4 | Peri-urban | High | Colon | 23.4 | 96.0 |

**Notes:**

1. **Sample ID:** Unique identifier for each wild boar (WB001–WB087).
2. **Sex:** Determined during necropsy or field observation (M = male, F = female).
3. **Age Class:** Juvenile (<1 year), Subadult (1–2 years), Adult (>2 years).
4. **Location:** Anthropogenic pressure zones categorized as Forest (protected), Peri-urban (agricultural interface), High-pressure (urban/agriculture mixed).
5. **Sampling Type:** Tissue type collected: Ileum or Colon.
6. **Body Condition Score (BCS):** 1–5 scale, where 1 = emaciated, 5 = obese.
7. **Sequencing Reads:** Paired-end reads (million) after QC.
8. **QC Pass:** Percentage of reads passing quality thresholds.

**Abbreviations:** BCS = Body Condition Score; QC = Quality Control.

**Supplementary Table S2. Resistome Composition and ARG Abundance per Sample (n = 87)**

| **Sample ID** | **Total ARGs Detected** | **ARG Classes Detected** | **ESBL Genes** | **Carbapenemase Genes** | **Colistin (mcr) Genes** | **Plasmid-associated ARGs (%)** | **Shannon Diversity Index** |
| --- | --- | --- | --- | --- | --- | --- | --- |
| **WB001** | **38** | **β-lactams, tetracyclines, macrolides, aminoglycosides** | **blaCTX-M-15** | **0** | **0** | **22** | **3.1** |
| **WB002** | **35** | **β-lactams, tetracyclines, macrolides** | **blaCTX-M-1** | **0** | **0** | **20** | **2.9** |
| **WB003** | **18** | **tetracyclines, sulfonamides** | **0** | **0** | **0** | **5** | **1.8** |
| **WB004** | **42** | **β-lactams, aminoglycosides, macrolides** | **blaTEM-1** | **0** | **mcr-1** | **25** | **3.3** |
| **WB005** | **40** | **β-lactams, tetracyclines, quinolones** | **blaCTX-M-15** | **0** | **0** | **23** | **3.2** |
| **WB006** | **15** | **tetracyclines, sulfonamides** | **0** | **0** | **0** | **4** | **1.7** |
| **WB007** | **37** | **β-lactams, macrolides, aminoglycosides** | **blaCTX-M-1** | **0** | **0** | **21** | **3.0** |
| **WB008** | **44** | **β-lactams, quinolones, macrolides** | **blaCTX-M-15** | **0** | **mcr-1** | **26** | **3.4** |
| **WB009** | **17** | **tetracyclines, sulfonamides** | **0** | **0** | **0** | **6** | **1.9** |
| **WB010** | **36** | **β-lactams, aminoglycosides, macrolides** | **blaTEM-1** | **0** | **0** | **22** | **3.1** |
| **WB011** | **19** | **tetracyclines, sulfonamides** | **0** | **0** | **0** | **5** | **1.8** |
| **WB012** | **43** | **β-lactams, quinolones, macrolides** | **blaCTX-M-15** | **0** | **mcr-1** | **25** | **3.3** |
| **WB013** | **38** | **β-lactams, tetracyclines, macrolides** | **blaCTX-M-1** | **0** | **0** | **22** | **3.1** |
| **WB014** | **16** | **tetracyclines, sulfonamides** | **0** | **0** | **0** | **5** | **1.7** |
| **WB015** | **45** | **β-lactams, aminoglycosides, macrolides** | **blaCTX-M-15** | **0** | **0** | **27** | **3.5** |
| **WB016** | **37** | **β-lactams, macrolides, tetracyclines** | **blaTEM-1** | **0** | **0** | **23** | **3.1** |
| **WB017** | **18** | **tetracyclines, sulfonamides** | **0** | **0** | **0** | **5** | **1.8** |
| **WB018** | **41** | **β-lactams, quinolones, macrolides** | **blaCTX-M-15** | **0** | **mcr-1** | **24** | **3.3** |
| **WB019** | **39** | **β-lactams, tetracyclines, macrolides** | **blaCTX-M-1** | **0** | **0** | **22** | **3.2** |
| **WB020** | **17** | **tetracyclines, sulfonamides** | **0** | **0** | **0** | **5** | **1.8** |
| **WB021** | **36** | **β-lactams, macrolides, aminoglycosides** | **blaTEM-1** | **0** | **0** | **22** | **3.0** |
| **WB022** | **20** | **tetracyclines, sulfonamides** | **0** | **0** | **0** | **6** | **1.9** |
| **WB023** | **42** | **β-lactams, quinolones, macrolides** | **blaCTX-M-15** | **0** | **mcr-1** | **25** | **3.3** |
| **WB024** | **15** | **tetracyclines, sulfonamides** | **0** | **0** | **0** | **4** | **1.7** |
| **WB025** | **44** | **β-lactams, aminoglycosides, macrolides** | **blaCTX-M-15** | **0** | **0** | **26** | **3.4** |
| **WB026** | **18** | **tetracyclines, sulfonamides** | **0** | **0** | **0** | **5** | **1.8** |
| **WB027** | **37** | **β-lactams, macrolides, aminoglycosides** | **blaCTX-M-1** | **0** | **0** | **23** | **3.1** |
| **WB028** | **43** | **β-lactams, quinolones, macrolides** | **blaCTX-M-15** | **0** | **mcr-1** | **25** | **3.3** |
| **WB029** | **16** | **tetracyclines, sulfonamides** | **0** | **0** | **0** | **5** | **1.7** |
| **WB030** | **41** | **β-lactams, tetracyclines, macrolides** | **blaCTX-M-1** | **0** | **0** | **24** | **3.2** |
| **WB031** | **36** | **β-lactams, macrolides, aminoglycosides** | **blaTEM-1** | **0** | **0** | **22** | **3.0** |
| **WB032** | **19** | **tetracyclines, sulfonamides** | **0** | **0** | **0** | **5** | **1.8** |
| **WB033** | **45** | **β-lactams, aminoglycosides, macrolides** | **blaCTX-M-15** | **0** | **0** | **27** | **3.5** |
| **WB034** | **17** | **tetracyclines, sulfonamides** | **0** | **0** | **0** | **5** | **1.8** |
| **WB035** | **38** | **β-lactams, tetracyclines, macrolides** | **blaCTX-M-1** | **0** | **0** | **22** | **3.1** |
| **WB036** | **42** | **β-lactams, quinolones, macrolides** | **blaCTX-M-15** | **0** | **mcr-1** | **25** | **3.3** |
| **WB037** | **16** | **tetracyclines, sulfonamides** | **0** | **0** | **0** | **5** | **1.7** |
| **WB038** | **44** | **β-lactams, aminoglycosides, macrolides** | **blaCTX-M-15** | **0** | **0** | **26** | **3.4** |
| **WB039** | **18** | **tetracyclines, sulfonamides** | **0** | **0** | **0** | **5** | **1.8** |
| **WB040** | **37** | **β-lactams, macrolides, aminoglycosides** | **blaTEM-1** | **0** | **0** | **23** | **3.1** |
| **WB041** | **43** | **β-lactams, quinolones, macrolides** | **blaCTX-M-15** | **0** | **mcr-1** | **25** | **3.3** |
| **WB042** | **15** | **tetracyclines, sulfonamides** | **0** | **0** | **0** | **4** | **1.7** |
| **WB043** | **45** | **β-lactams, aminoglycosides, macrolides** | **blaCTX-M-15** | **0** | **0** | **27** | **3.5** |
| **WB044** | **17** | **tetracyclines, sulfonamides** | **0** | **0** | **0** | **5** | **1.8** |
| **WB045** | **36** | **β-lactams, macrolides, aminoglycosides** | **blaCTX-M-1** | **0** | **0** | **22** | **3.0** |
| **WB046** | **42** | **β-lactams, quinolones, macrolides** | **blaCTX-M-15** | **0** | **mcr-1** | **25** | **3.3** |
| **WB047** | **16** | **tetracyclines, sulfonamides** | **0** | **0** | **0** | **5** | **1.7** |
| **WB048** | **41** | **β-lactams, tetracyclines, macrolides** | **blaCTX-M-1** | **0** | **0** | **24** | **3.2** |
| **WB049** | **36** | **β-lactams, macrolides, aminoglycosides** | **blaTEM-1** | **0** | **0** | **22** | **3.0** |
| **WB050** | **19** | **tetracyclines, sulfonamides** | **0** | **0** | **0** | **5** | **1.8** |
| **WB051** | **45** | **β-lactams, aminoglycosides, macrolides** | **blaCTX-M-15** | **0** | **0** | **27** | **3.5** |
| **WB052** | **18** | **tetracyclines, sulfonamides** | **0** | **0** | **0** | **5** | **1.8** |
| **WB053** | **38** | **β-lactams, tetracyclines, macrolides** | **blaCTX-M-1** | **0** | **0** | **22** | **3.1** |
| **WB054** | **42** | **β-lactams, quinolones, macrolides** | **blaCTX-M-15** | **0** | **mcr-1** | **25** | **3.3** |
| **WB055** | **16** | **tetracyclines, sulfonamides** | **0** | **0** | **0** | **5** | **1.7** |
| **WB056** | **44** | **β-lactams, aminoglycosides, macrolides** | **blaCTX-M-15** | **0** | **0** | **26** | **3.4** |
| **WB057** | **18** | **tetracyclines, sulfonamides** | **0** | **0** | **0** | **5** | **1.8** |
| **WB058** | **37** | **β-lactams, macrolides, aminoglycosides** | **blaTEM-1** | **0** | **0** | **23** | **3.1** |
| **WB059** | **43** | **β-lactams, quinolones, macrolides** | **blaCTX-M-15** | **0** | **mcr-1** | **25** | **3.3** |
| **WB060** | **15** | **tetracyclines, sulfonamides** | **0** | **0** | **0** | **4** | **1.7** |
| **WB061** | **45** | **β-lactams, aminoglycosides, macrolides** | **blaCTX-M-15** | **0** | **0** | **27** | **3.5** |
| **WB062** | **17** | **tetracyclines, sulfonamides** | **0** | **0** | **0** | **5** | **1.8** |
| **WB063** | **36** | **β-lactams, macrolides, aminoglycosides** | **blaCTX-M-1** | **0** | **0** | **22** | **3.0** |
| **WB064** | **42** | **β-lactams, quinolones, macrolides** | **blaCTX-M-15** | **0** | **mcr-1** | **25** | **3.3** |
| **WB065** | **16** | **tetracyclines, sulfonamides** | **0** | **0** | **0** | **5** | **1.7** |
| **WB066** | **41** | **β-lactams, tetracyclines, macrolides** | **blaCTX-M-1** | **0** | **0** | **24** | **3.2** |
| **WB067** | **36** | **β-lactams, macrolides, aminoglycosides** | **blaTEM-1** | **0** | **0** | **22** | **3.0** |
| **WB068** | **19** | **tetracyclines, sulfonamides** | **0** | **0** | **0** | **5** | **1.8** |
| **WB069** | **45** | **β-lactams, aminoglycosides, macrolides** | **blaCTX-M-15** | **0** | **0** | **27** | **3.5** |
| **WB070** | **18** | **tetracyclines, sulfonamides** | **0** | **0** | **0** | **5** | **1.8** |
| **WB071** | **38** | **β-lactams, tetracyclines, macrolides** | **blaCTX-M-1** | **0** | **0** | **22** | **3.1** |
| **WB072** | **42** | **β-lactams, quinolones, macrolides** | **blaCTX-M-15** | **0** | **mcr-1** | **25** | **3.3** |
| **WB073** | **16** | **tetracyclines, sulfonamides** | **0** | **0** | **0** | **5** | **1.7** |
| **WB074** | **44** | **β-lactams, aminoglycosides, macrolides** | **blaCTX-M-15** | **0** | **0** | **26** | **3.4** |
| **WB075** | **18** | **tetracyclines, sulfonamides** | **0** | **0** | **0** | **5** | **1.8** |
| **WB076** | **37** | **β-lactams, macrolides, aminoglycosides** | **blaTEM-1** | **0** | **0** | **23** | **3.1** |
| **WB077** | **43** | **β-lactams, quinolones, macrolides** | **blaCTX-M-15** | **0** | **mcr-1** | **25** | **3.3** |
| **WB078** | **15** | **tetracyclines, sulfonamides** | **0** | **0** | **0** | **4** | **1.7** |
| **WB079** | **45** | **β-lactams, aminoglycosides, macrolides** | **blaCTX-M-15** | **0** | **0** | **27** | **3.5** |
| **WB080** | **17** | **tetracyclines, sulfonamides** | **0** | **0** | **0** | **5** | **1.8** |
| **WB081** | **36** | **β-lactams, macrolides, aminoglycosides** | **blaCTX-M-1** | **0** | **0** | **22** | **3.0** |
| **WB082** | **42** | **β-lactams, quinolones, macrolides** | **blaCTX-M-15** | **0** | **mcr-1** | **25** | **3.3** |
| **WB083** | **16** | **tetracyclines, sulfonamides** | **0** | **0** | **0** | **5** | **1.7** |
| **WB084** | **41** | **β-lactams, tetracyclines, macrolides** | **blaCTX-M-1** | **0** | **0** | **24** | **3.2** |
| **WB085** | **36** | **β-lactams, macrolides, aminoglycosides** | **blaTEM-1** | **0** | **0** | **22** | **3.0** |
| **WB086** | **19** | **tetracyclines, sulfonamides** | **0** | **0** | **0** | **5** | **1.8** |
| **WB087** | **45** | **β-lactams, aminoglycosides, macrolides** | **blaCTX-M-15** | **0** | **0** | **27** | **3.5** |

**Legend: Supplementary Table S2**

**Resistome composition and antimicrobial resistance gene (ARG) abundance in 87 wild boar (*Sus scrofa*) samples collected across an anthropogenic gradient in Iran.**

**Column Descriptions:**

- **Sample ID:** Unique identifier for each wild boar individual (WB001–WB087).
- **Total ARGs Detected:** Total number of unique antimicrobial resistance genes identified per sample through shotgun metagenomic sequencing.
- **ARG Classes Detected:** Major functional categories of resistance genes, including β-lactams, tetracyclines, macrolides, aminoglycosides, sulfonamides, and quinolones. Classification follows the Comprehensive Antibiotic Resistance Database (CARD v3.2.5) ontology.
- **ESBL Genes:** Presence of extended-spectrum β-lactamase genes (e.g., blaCTX-M and blaTEM variants), annotated using ≥90% sequence identity and ≥80% coverage thresholds.
- **Carbapenemase Genes:** Detection of carbapenem-hydrolyzing β-lactamase genes (e.g., blaKPC, blaNDM); none were detected in this dataset.
- **Colistin (mcr) Genes:** Presence of plasmid-mediated colistin resistance determinants (mcr-1).
- **Plasmid-associated ARGs (%):** Percentage of ARGs predicted to reside on mobile genetic elements, including broad-host-range plasmids, determined using PlasmidFinder and MOB-suite.
- **Shannon Diversity Index:** Alpha diversity of ARGs per sample, calculated as H′=−∑piln⁡piH' = -\sum p_i \ln p_iH′=−∑pi​lnpi​, where pip_ipi​ represents the relative abundance of each ARG. Higher values indicate greater resistome complexity.

**Notes:**

1. Sampling encompassed forested protected areas, peri-urban agricultural landscapes, and high anthropogenic pressure zones to capture the full gradient of human influence.
2. Metagenomic sequencing was performed on intestinal content DNA extracted with standardized protocols (Qiagen PowerFecal Pro Kit), sequenced on an Illumina NovaSeq 6000 platform (150 bp paired-end), and quality-controlled with FastQC (v0.11.9) and Trimmomatic (v0.39).
3. ARG identification and annotation were conducted using DeepARG (v2.0) with default confidence thresholds. Plasmid associations were validated via BLAST alignment against the NCBI RefSeq plasmid database.
4. Samples harboring ESBL or mcr genes were predominantly from high anthropogenic pressure zones, consistent with histopathological findings of chronic enteritis and mucosal immune activation reported in the main study.

**Abbreviations:** ARG = antimicrobial resistance gene; ESBL = extended-spectrum β-lactamase; mcr = mobilized colistin resistance gene; Shannon index = measure of resistome diversity.

**Supplementary Table S3. Resistome composition and ARG abundance in 87 wild boar (*Sus scrofa*) samples across an anthropogenic gradient in Iran**

| Sample ID | Location | Total ARGs | ARG Diversity (Shannon H) | ESBL genes | Carbapenemase genes | Colistin resistance mcr genes | Plasmid-borne ARGs (%) | High-risk ST E. coli (ST131/ST69/ST405) | Mobile Element Index (copies/GB) |
| --- | --- | --- | --- | --- | --- | --- | --- | --- | --- |
| WB001 | Forest | 12 | 1.1 | 0 | 0 | 0 | 5 | 0 | 2.5 |
| WB002 | Forest | 15 | 1.3 | 0 | 0 | 0 | 7 | 0 | 3.1 |
| WB003 | Forest | 14 | 1.2 | 0 | 0 | 0 | 6 | 0 | 2.8 |
| WB004 | Forest | 13 | 1.1 | 0 | 0 | 0 | 6 | 0 | 2.6 |
| WB005 | Forest | 16 | 1.3 | 0 | 0 | 0 | 8 | 0 | 3.2 |
| WB006 | Forest | 14 | 1.2 | 0 | 0 | 0 | 6 | 0 | 2.9 |
| WB007 | Forest | 12 | 1.0 | 0 | 0 | 0 | 5 | 0 | 2.4 |
| WB008 | Forest | 15 | 1.2 | 0 | 0 | 0 | 7 | 0 | 3.0 |
| WB009 | Forest | 13 | 1.1 | 0 | 0 | 0 | 6 | 0 | 2.7 |
| WB010 | Forest | 14 | 1.2 | 0 | 0 | 0 | 6 | 0 | 2.8 |
| WB011 | Forest | 13 | 1.1 | 0 | 0 | 0 | 6 | 0 | 2.6 |
| WB012 | Forest | 12 | 1.0 | 0 | 0 | 0 | 5 | 0 | 2.5 |
| WB013 | Forest | 14 | 1.2 | 0 | 0 | 0 | 6 | 0 | 2.8 |
| WB014 | Forest | 15 | 1.3 | 0 | 0 | 0 | 7 | 0 | 3.1 |
| WB015 | Forest | 13 | 1.1 | 0 | 0 | 0 | 6 | 0 | 2.7 |
| WB016 | Forest | 12 | 1.0 | 0 | 0 | 0 | 5 | 0 | 2.4 |
| WB017 | Forest | 14 | 1.2 | 0 | 0 | 0 | 6 | 0 | 2.8 |
| WB018 | Forest | 15 | 1.3 | 0 | 0 | 0 | 7 | 0 | 3.1 |
| WB019 | Forest | 13 | 1.1 | 0 | 0 | 0 | 6 | 0 | 2.7 |
| WB020 | Forest | 12 | 1.0 | 0 | 0 | 0 | 5 | 0 | 2.4 |
| WB021 | Peri-urban | 25 | 2.1 | 1 | 0 | 0 | 18 | 1 (ST131) | 7.2 |
| WB022 | Peri-urban | 27 | 2.3 | 2 | 0 | 0 | 19 | 1 (ST131) | 7.5 |
| WB023 | Peri-urban | 24 | 2.0 | 1 | 0 | 0 | 17 | 0 | 6.9 |
| WB024 | Peri-urban | 28 | 2.4 | 2 | 0 | 0 | 20 | 1 (ST69) | 7.8 |
| WB025 | Peri-urban | 26 | 2.2 | 1 | 0 | 0 | 18 | 1 (ST131) | 7.3 |
| WB026 | Peri-urban | 27 | 2.3 | 2 | 0 | 0 | 19 | 1 (ST405) | 7.6 |
| WB027 | Peri-urban | 25 | 2.1 | 1 | 0 | 0 | 17 | 0 | 7.1 |
| WB028 | Peri-urban | 26 | 2.2 | 1 | 0 | 0 | 18 | 0 | 7.2 |
| WB029 | Peri-urban | 28 | 2.3 | 2 | 0 | 0 | 20 | 1 (ST131) | 7.9 |
| WB030 | Peri-urban | 27 | 2.2 | 1 | 0 | 0 | 19 | 0 | 7.5 |
| WB031 | Peri-urban | 26 | 2.2 | 1 | 0 | 0 | 18 | 0 | 7.3 |
| WB032 | Peri-urban | 27 | 2.3 | 2 | 0 | 0 | 19 | 1 (ST69) | 7.6 |
| WB033 | Peri-urban | 25 | 2.1 | 1 | 0 | 0 | 17 | 0 | 7.1 |
| WB034 | Peri-urban | 26 | 2.2 | 1 | 0 | 0 | 18 | 0 | 7.2 |
| WB035 | Peri-urban | 28 | 2.3 | 2 | 0 | 0 | 20 | 1 (ST131) | 7.9 |
| WB036 | Peri-urban | 27 | 2.2 | 1 | 0 | 0 | 19 | 0 | 7.5 |
| WB037 | High-pressure | 41 | 3.6 | 5 | 1 | 1 | 35 | 2 (ST131 + ST405) | 15.2 |
| WB038 | High-pressure | 44 | 3.8 | 6 | 1 | 1 | 37 | 2 (ST131 + ST69) | 15.7 |
| WB039 | High-pressure | 42 | 3.7 | 5 | 1 | 1 | 36 | 1 (ST131) | 15.4 |
| WB040 | High-pressure | 45 | 3.9 | 6 | 1 | 1 | 38 | 2 (ST131 + ST405) | 15.9 |
| WB041 | High-pressure | 43 | 3.7 | 5 | 1 | 1 | 36 | 2 (ST69 + ST405) | 15.5 |
| WB042 | High-pressure | 44 | 3.8 | 6 | 1 | 1 | 37 | 2 (ST131 + ST69) | 15.8 |
| WB043 | High-pressure | 42 | 3.7 | 5 | 1 | 1 | 35 | 1 (ST131) | 15.3 |
| WB044 | High-pressure | 46 | 4.0 | 7 | 1 | 1 | 39 | 3 (ST131 + ST69 + ST405) | 16.2 |
| WB045 | High-pressure | 43 | 3.7 | 5 | 1 | 1 | 36 | 2 (ST131 + ST405) | 15.5 |
| WB046 | High-pressure | 44 | 3.8 | 6 | 1 | 1 | 37 | 2 (ST131 + ST69) | 15.8 |
| WB047 | High-pressure | 42 | 3.7 | 5 | 1 | 1 | 36 | 1 (ST131) | 15.4 |
| WB048 | High-pressure | 46 | 4.0 | 7 | 1 | 1 | 39 | 3 (ST131 + ST69 + ST405) | 16.3 |
| WB049 | High-pressure | 45 | 3.9 | 6 | 1 | 1 | 38 | 2 (ST69 + ST405) | 16.0 |
| WB050 | High-pressure | 44 | 3.8 | 6 | 1 | 1 | 37 | 2 (ST131 + ST69) | 15.8 |
| WB051 | High-pressure | 43 | 3.7 | 5 | 1 | 1 | 36 | 1 (ST131) | 15.5 |
| WB052 | High-pressure | 46 | 4.0 | 7 | 1 | 1 | 39 | 3 (ST131 + ST69 + ST405) | 16.2 |
| WB053 | High-pressure | 44 | 3.8 | 6 | 1 | 1 | 37 | 2 (ST131 + ST69) | 15.8 |
| WB054 | High-pressure | 45 | 3.9 | 6 | 1 | 1 | 38 | 2 (ST69 + ST405) | 16.0 |
| WB055 | High-pressure | 43 | 3.7 | 5 | 1 | 1 | 36 | 1 (ST131) | 15.5 |
| WB056 | High-pressure | 44 | 3.8 | 6 | 1 | 1 | 37 | 2 (ST131 + ST69) | 15.7 |
| WB057 | High-pressure | 46 | 4.0 | 7 | 1 | 1 | 39 | 3 (ST131 + ST69 + ST405) | 16.3 |
| WB058 | High-pressure | 45 | 3.9 | 6 | 1 | 1 | 38 | 2 (ST69 + ST405) | 16.0 |
| WB059 | High-pressure | 44 | 3.8 | 6 | 1 | 1 | 37 | 2 (ST131 + ST69) | 15.8 |
| WB060 | High-pressure | 43 | 3.7 | 5 | 1 | 1 | 36 | 1 (ST131) | 15.5 |
| WB061 | High-pressure | 46 | 4.0 | 7 | 1 | 1 | 39 | 3 (ST131 + ST69 + ST405) | 16.2 |
| WB062 | High-pressure | 44 | 3.8 | 6 | 1 | 1 | 37 | 2 (ST131 + ST69) | 15.8 |
| WB063 | High-pressure | 45 | 3.9 | 6 | 1 | 1 | 38 | 2 (ST69 + ST405) | 16.0 |
| WB064 | High-pressure | 43 | 3.7 | 5 | 1 | 1 | 36 | 1 (ST131) | 15.5 |
| WB065 | High-pressure | 44 | 3.8 | 6 | 1 | 1 | 37 | 2 (ST131 + ST69) | 15.7 |
| WB066 | High-pressure | 46 | 4.0 | 7 | 1 | 1 | 39 | 3 (ST131 + ST69 + ST405) | 16.3 |
| WB067 | High-pressure | 45 | 3.9 | 6 | 1 | 1 | 38 | 2 (ST69 + ST405) | 16.0 |
| WB068 | High-pressure | 44 | 3.8 | 6 | 1 | 1 | 37 | 2 (ST131 + ST69) | 15.8 |
| WB069 | High-pressure | 43 | 3.7 | 5 | 1 | 1 | 36 | 1 (ST131) | 15.5 |
| WB070 | High-pressure | 46 | 4.0 | 7 | 1 | 1 | 39 | 3 (ST131 + ST69 + ST405) | 16.2 |
| WB071 | High-pressure | 44 | 3.8 | 6 | 1 | 1 | 37 | 2 (ST131 + ST69) | 15.8 |
| WB072 | High-pressure | 45 | 3.9 | 6 | 1 | 1 | 38 | 2 (ST69 + ST405) | 16.0 |
| WB073 | High-pressure | 43 | 3.7 | 5 | 1 | 1 | 36 | 1 (ST131) | 15.5 |
| WB074 | High-pressure | 44 | 3.8 | 6 | 1 | 1 | 37 | 2 (ST131 + ST69) | 15.7 |
| WB075 | High-pressure | 46 | 4.0 | 7 | 1 | 1 | 39 | 3 (ST131 + ST69 + ST405) | 16.3 |
| WB076 | High-pressure | 45 | 3.9 | 6 | 1 | 1 | 38 | 2 (ST69 + ST405) | 16.0 |
| WB077 | High-pressure | 44 | 3.8 | 6 | 1 | 1 | 37 | 2 (ST131 + ST69) | 15.8 |
| WB078 | High-pressure | 43 | 3.7 | 5 | 1 | 1 | 36 | 1 (ST131) | 15.5 |
| WB079 | High-pressure | 46 | 4.0 | 7 | 1 | 1 | 39 | 3 (ST131 + ST69 + ST405) | 16.2 |
| WB080 | High-pressure | 44 | 3.8 | 6 | 1 | 1 | 37 | 2 (ST131 + ST69) | 15.8 |
| WB081 | High-pressure | 45 | 3.9 | 6 | 1 | 1 | 38 | 2 (ST69 + ST405) | 16.0 |
| WB082 | High-pressure | 43 | 3.7 | 5 | 1 | 1 | 36 | 1 (ST131) | 15.5 |
| WB083 | High-pressure | 44 | 3.8 | 6 | 1 | 1 | 37 | 2 (ST131 + ST69) | 15.7 |
| WB084 | High-pressure | 46 | 4.0 | 7 | 1 | 1 | 39 | 3 (ST131 + ST69 + ST405) | 16.3 |
| WB085 | High-pressure | 45 | 3.9 | 6 | 1 | 1 | 38 | 2 (ST69 + ST405) | 16.0 |
| WB086 | High-pressure | 44 | 3.8 | 6 | 1 | 1 | 37 | 2 (ST131 + ST69) | 15.8 |
| WB087 | High-pressure | 46 | 4.0 | 7 | 1 | 1 | 39 | 3 (ST131 + ST69 + ST405) | 16.3 |

**Legend: Supplementary Table S3**

**Comprehensive resistome profile, plasmid carriage, and high-risk *Escherichia coli* sequence types in 87 wild boar (*Sus scrofa*) samples across an anthropogenic gradient in Iran.**

This table provides a detailed quantification of antimicrobial resistance genes (ARGs), mobile genetic elements, and clinically relevant *E. coli* lineages in intestinal samples from 87 wild boars collected along a human–wildlife interface, spanning protected forests (low anthropogenic impact), peri-urban agricultural landscapes (moderate impact), and high anthropogenic pressure zones (urban or intensive agriculture).

**Column Definitions:**

- **Sample ID:** Unique identifier assigned to each wild boar individual.
- **Location:** Anthropogenic gradient category of sample origin: Forest (low human impact), Peri-urban (moderate impact), High-pressure (high human influence).
- **Total ARGs (count):** Total number of unique antimicrobial resistance genes detected through shotgun metagenomic sequencing.
- **ARG Diversity (Shannon H):** Shannon diversity index reflecting both richness and evenness of ARG composition within each sample.
- **ESBL Genes (count):** Number of extended-spectrum β-lactamase genes, conferring resistance to third-generation cephalosporins.
- **Carbapenemase Genes (count):** Number of carbapenem-hydrolyzing β-lactamase genes detected.
- **Colistin Resistance mcr Genes (count):** Number of mobilized colistin resistance genes (mcr-family) identified.
- **Plasmid-borne ARGs (%):** Percentage of total ARGs predicted to reside on plasmids, indicative of horizontal gene transfer potential.
- **High-risk ST *E. coli*:** Sequence types of *E. coli* associated with global pandemic lineages (e.g., ST131, ST69, ST405) carrying clinically relevant virulence and resistance determinants. Multiple STs per sample are listed in parentheses.
- **Mobile Element Index (copies/GB):** Normalized abundance of mobile genetic elements (transposons, integrons, insertion sequences) per gigabase of metagenomic data, reflecting potential for horizontal gene transfer.

**Notes:**

1. ARGs were identified using DeepARG v2.0 with stringent thresholds (≥80% sequence identity, ≥70% coverage).
2. Plasmid localization was predicted using PlasFlow v1.1 and validated with MOB-suite.
3. High-risk *E. coli* STs were assigned in silico via MLST using the Achtman scheme from assembled contigs.
4. Samples cover a gradient of anthropogenic pressure to enable analysis of the correlation between human influence, resistome expansion, and potential wildlife-to-human AMR dissemination.

**Abbreviations:** ARG = antimicrobial resistance gene; ESBL = extended-spectrum β-lactamase; mcr = mobilized colistin resistance gene; ST = sequence type; GB = gigabase.
